# Supplementary material
Source: PubMed Central journal article supplement (PMC10687714)
Supplement: jamasurg-e236031-s001.pdf [file jamasurg-e236031-s001.pdf]

## Supplementary Online Content

Wallis CJD, Jerath A, Aminoltejari K. Surgeon sex and health care costs for patients undergoing common surgical procedures. *JAMA Surg*. Published online November 29, 2023. doi:10.1001/jamasurg.2023.6031

**eTable 1.** List of Included Procedures

**eTable 2.** Baseline Characteristics of Study Cohort, Stratified by Surgeon Sex

**eTable 3.** Multivariable Adjusted Total Health Care Costs for Patients Undergoing Common Elective and Emergent Surgeries, Stratified by Patient-Surgeon Sex Dyad

**eTable 4.** Multivariable Adjusted Relative Total Health Care Costs for Patients Undergoing Common Elective and Emergent Surgeries, Stratified by Patient-Surgeon Sex Dyad

**eTable 5.** Multivariable Adjusted Health Care Costs For Patients Undergoing Common Elective and Emergent Surgeries, Stratified by Patient-Surgeon Sex Concordance

**eTable 6.** Crude Costs, Stratified by Surgeon Sex

**eTable 7.** Crude Costs, Stratified by Patient-Surgeon Sex Concordance

**eTable 8.** Sensitivity Analysis of Multivariable Adjusted Models Assessing the Association Between Surgeon Sex and Total Health Care Costs, Further Including Operative Duration as a Covariate

**eTable 9.** Sensitivity Analysis of Multivariable Adjusted Models Assessing the Association Between Patient-Surgeon Sex Concordance and Total Health Care Costs, Further Including Operative Duration as a Covariate

This supplementary material has been provided by the authors to give readers additional information about their work.

**eTable 1.** List of included procedures.

| Surgery categorization           | OHIP Procedure code | Procedural description                                                                                                                        |
|----------------------------------|---------------------|-----------------------------------------------------------------------------------------------------------------------------------------------|
| <b>Cardiovascular surgery</b>    |                     |                                                                                                                                               |
| Coronary artery bypass grafting  | R742                | Coronary artery repair, one vessel                                                                                                            |
|                                  | R743                | Coronary artery repair, two vessels                                                                                                           |
| Abdominal aortic aneurysm repair | R802                | Abdominal aortic aneurysm repair alone or including unilateral common femoral repair                                                          |
|                                  | R817                | Abdominal aortic aneurysm repair and bilateral common femoral repair                                                                          |
|                                  | R877                | Abdominal aortic aneurysm with repair of iliac artery aneurysm (unilateral or bilateral)                                                      |
| <b>General surgery</b>           |                     |                                                                                                                                               |
| Appendectomy                     | S205                | Appendectomy (without gross perforation)                                                                                                      |
| Cholecystectomy                  | S287                | Cholecystectomy                                                                                                                               |
| Gastric-bypass                   | S120                | Gastric bypass with Roux-en-Y anastomosis, for morbid obesity                                                                                 |
| Colon resection                  | S166                | Resection with anastomosis: Small and large intestine terminal ileum, cecum and ascending colon (right hemicolectomy)                         |
|                                  | S167                | Resection with anastomosis: Large intestine - any portion                                                                                     |
|                                  | S168                | Ileostomy – subtotal colectomy                                                                                                                |
|                                  | S169                | Total colectomy with ileo-rectal anastomosis                                                                                                  |
|                                  | S170                | Ileostomy - plus total colectomy plus abdomino-perineal resection                                                                             |
|                                  | S171                | Left hemicolectomy with anterior resection or proctosigmoidectomy (anastomosis below peritoneal reflection & mobilization of splenic flexure) |
|                                  | S173                | Two-surgeon team abdomino-perineal resection: abdominal                                                                                       |
|                                  | S174                | Two-surgeon team abdomino-perineal resection: perineal                                                                                        |
|                                  | S213                | Proctectomy - Anterior resection or proctosigmoidectomy (anastomosis below peritoneal reflection)                                             |
|                                  | S214                | Proctectomy - Abdomino-perineal resection or pull through                                                                                     |
|                                  | S215                | Proctectomy – two-surgeon team: abdominal                                                                                                     |
|                                  | S216                | Proctectomy – two-surgeon team: perineal                                                                                                      |
|                                  | S217                | Hartmann procedure                                                                                                                            |
| Liver resection                  | S267                | Hepatectomy – three or four liver segments                                                                                                    |
|                                  | S269                | Hepatectomy – local excision of lesion                                                                                                        |
|                                  | S270                | Hepatectomy – one or two liver segments                                                                                                       |
|                                  | S271                | Hepatectomy – five or more liver segments                                                                                                     |
|                                  | S275                | Hepatectomy – partial lobectomy                                                                                                               |

|                                  |      |                                                                                                                                                       |
|----------------------------------|------|-------------------------------------------------------------------------------------------------------------------------------------------------------|
| <b>Obstetrics and gynecology</b> |      |                                                                                                                                                       |
| Hysterectomy                     | S710 | Hysterectomy with or without adenexa – with omentectomy for malignancy                                                                                |
|                                  | S757 | Hysterectomy with or without adenexa – abdominal, total or subtotal                                                                                   |
|                                  | S758 | Hysterectomy with or without adenexa – with anterior and posterior vaginal repair and including enterocele and/or vault prolapse repair when rendered |
|                                  | S759 | Hysterectomy with or without adenexa – with anterior or posterior vaginal repair and including enterocele and/or vault prolapse repair when rendered  |
|                                  | S763 | Hysterectomy with or without adenexa – radical, includes node dissection                                                                              |
|                                  | S816 | Hysterectomy with or without adenexa – vaginal                                                                                                        |
| <b>Neurosurgery</b>              |      |                                                                                                                                                       |
| Anterior spinal decompression    | N500 | Anterior spinal decompression – cervical, disc excision                                                                                               |
|                                  | N501 | Anterior spinal decompression – cervical, vertebrectomy                                                                                               |
|                                  | N502 | Anterior spinal decompression – thoracic, disc excision                                                                                               |
|                                  | N503 | Anterior spinal decompression – thoracic, vertebrectomy                                                                                               |
|                                  | N504 | Anterior spinal decompression – thoracic, disc excision                                                                                               |
|                                  | N505 | Anterior spinal decompression – thoracic, vertebrectomy                                                                                               |
|                                  | N506 | Anterior spinal decompression – lumbar, disc excision                                                                                                 |
|                                  | N507 | Anterior spinal decompression – lumbar, vertebrectomy                                                                                                 |
|                                  | N508 | Anterior spinal decompression – lumbar, disc excision                                                                                                 |
|                                  | N579 | Anterior spinal decompression – lumbar, vertebrectomy                                                                                                 |
| Anterior spinal arthrodesis      | N516 | Anterior spinal arthrodesis with instrumentation without decompression – cervical, one disc                                                           |
|                                  | N517 | Anterior spinal arthrodesis with instrumentation without decompression – thoracic, one disc                                                           |
|                                  | N518 | Anterior spinal arthrodesis with instrumentation without decompression – thoracic, one disc                                                           |
|                                  | N559 | Anterior spinal arthrodesis with instrumentation without decompression – lumbar, one disc                                                             |
|                                  | N580 | Anterior spinal arthrodesis with instrumentation without decompression – lumbar, one disc                                                             |
| Posterior spinal decompression   | N509 | Posterior spinal decompression – cervical/thoracic, one level - unilateral                                                                            |
|                                  | N510 | Posterior spinal decompression – cervical/thoracic, one level - bilateral                                                                             |
|                                  | N511 | Posterior spinal decompression – lumbar, one level - unilateral                                                                                       |
|                                  | N512 | Posterior spinal decompression – lumbar, one level - bilateral                                                                                        |
|                                  | N520 | Posterior spinal decompression – cervical/thoracic, one level - laminoplasty                                                                          |
|                                  | N524 | Posterior spinal decompression – lumbar, one level – bilateral canal enlargement                                                                      |
| Posterior spinal arthrodesis     | N514 | Posterior spinal arthrodesis as sole procedure – cervical/thoracic without instrumentation – one disc level, below C2                                 |
|                                  | N515 | Posterior spinal arthrodesis as sole procedure – cervical/thoracic with instrumentation – one disc level, below C2                                    |
|                                  | N519 | Posterior spinal arthrodesis as sole procedure – cervical/thoracic without instrumentation – C1/C2 fusion                                             |

|                                                      |      |                                                                                                                    |
|------------------------------------------------------|------|--------------------------------------------------------------------------------------------------------------------|
|                                                      | N533 | Posterior spinal arthrodesis as sole procedure – lumbar with instrumentation, pars reconstruction                  |
|                                                      | N581 | Posterior spinal arthrodesis as sole procedure – lumbar without instrumentation – one disc level                   |
|                                                      | N582 | Posterior spinal arthrodesis as sole procedure – lumbar with instrumentation – one disc level                      |
| Craniotomy / brain biopsy                            | N102 | Craniotomy plus excision – supratentorial for meningioma and other tumours                                         |
|                                                      | N103 | Craniotomy plus excision – supratentorial for astrocytoma, oligodendroglioma, glioblastoma or metastatic tumor     |
|                                                      | N113 | Craniotomy for brain biopsy (other than for tumour)                                                                |
|                                                      | N151 | Craniotomy plus excision – infratentorial for astrocytoma, oligodendroglioma, glioblastoma or metastatic tumor     |
|                                                      | N152 | Craniotomy plus excision – craniotomy plus lobectomy                                                               |
|                                                      | N153 | Craniotomy plus excision – infratentorial for meningioma and other tumours                                         |
| <b>Otolaryngology</b>                                |      |                                                                                                                    |
| Total thyroidectomy                                  | S788 | Thyroidectomy, total                                                                                               |
| Neck dissection                                      | R910 | Neck lymph nodes - limited dissection, must include 2 levels (unilateral) or central compartment                   |
|                                                      | R915 | Neck lymph nodes - comprehensive dissection, must include 3 or more levels, unilateral                             |
| <b>Orthopedic surgery</b>                            |      |                                                                                                                    |
| Knee replacement                                     | R441 | Knee - Total replacement/both compartments                                                                         |
| Hip replacement                                      | R440 | Pelvic and hip - Total hip replacement - acetabulum and femur                                                      |
| Open repair of femoral neck / femoral shaft fracture | F099 | Reduction, fractures, femoral neck trochanteric, subtrochanteric – open reduction – pin only                       |
|                                                      | F096 | Femur, fracture – open reduction                                                                                   |
|                                                      | F100 | Reduction, fractures, femoral neck trochanteric, subtrochanteric – open reduction – pin and plate/screens          |
|                                                      | F101 | Reduction, fractures, femoral neck trochanteric, subtrochanteric – open reduction – primary prosthesis             |
| <b>Plastic surgery</b>                               |      |                                                                                                                    |
| Carpal tunnel release                                | N290 | Carpal tunnel release                                                                                              |
| Breast reduction                                     | R110 | Reduction mammoplasty (female, to include nipple transplantation or grafting, if rendered) - unilateral            |
| <b>Thoracic surgery</b>                              |      |                                                                                                                    |
| Lung resection                                       | M142 | Pneumonectomy, may include radical mediastinal node dissection, sampling or pericardial resection requiring repair |
|                                                      | M143 | Lobectomy, may include radical mediastinal node dissection or sampling                                             |
|                                                      | M144 | Segmental resection, including segmental bronchus and artery                                                       |
| <b>Urology</b>                                       |      |                                                                                                                    |
| Radical cystectomy                                   | S440 | Cystectomy – complete – with continent urinary diversion                                                           |
|                                                      | S453 | Cystectomy – complete – with ureteroileal conduit                                                                  |
| Radical prostatectomy                                | S651 | Prostatectomy – radical                                                                                            |

|                                     |      |                                                                                                                                         |
|-------------------------------------|------|-----------------------------------------------------------------------------------------------------------------------------------------|
| Transurethral resection of prostate | S655 | Transurethral resection of prostate - and may include cystoscopy, meatotomy, dilatation of stricture, internal urethrotomy or vasectomy |
| <b>Vascular surgery</b>             |      |                                                                                                                                         |
| Femoral-popliteal bypass            | R791 | Femoro-popliteal bypass - with saphenous vein                                                                                           |
|                                     | R794 | Femoro-popliteal bypass – with prosthetic graft                                                                                         |

**eTable 2. Baseline characteristics of study cohort, stratified by surgeon sex**

|                                         | Label or value         | Male Surgeon    | Female Surgeon  | Absolute Difference (95% CL) | Standardized Difference (95% CI) |
|-----------------------------------------|------------------------|-----------------|-----------------|------------------------------|----------------------------------|
| Patients, n                             |                        | N=1,014,657     | N=151,054       | n.a                          | n.a                              |
| <b>Surgeon characteristics</b>          |                        |                 |                 |                              |                                  |
| Age                                     | Mean (SD), years       | 49.8 (9.5)      | 45.1 (8.3)      | 4.6 (4.6, 4.7)               | 0.519 (0.514, 0.525)             |
| Annual case volume (quartiles), n (%)   | 1 - Lowest             | 225,407 (22.2%) | 56,528 (37.4%)  | 15.2 (14.8, 15.6)            | 0.337 (0.328, 0.346)             |
|                                         | 2-                     | 257,544 (25.4%) | 44,758 (29.6%)  | 4.2 (3.8, 4.7)               | 0.095 (0.085, 0.105)             |
|                                         | 3-                     | 254,327 (25.1%) | 30,976 (20.5%)  | 4.6 (4.1, 5.0)               | 0.109 (0.097, 0.121)             |
|                                         | 4 - Highest            | 277,379 (27.3%) | 18,792 (12.4%)  | 14.9 (14.4, 15.4)            | 0.380 (0.365, 0.395)             |
| Years in practice                       | Mean (SD), years       | 16.2 (8.6)      | 12.6 (8.1)      | 3.6 (3.6, 3.6)               | 0.431 (0.425, 0.436)             |
| Specialty, n (%)                        | Cardiothoracic Surgery | 3,775 (0.4%)    | 203 (0.1%)      | 0.2 (-0.3, 0.8)              | 0.047 (-0.094, 0.189)            |
|                                         | General Surgery        | 324,155 (31.9%) | 61,666 (40.8%)  | 8.9 (8.5, 9.3)               | 0.185 (0.177, 0.194)             |
|                                         | Neurosurgery           | 56,049 (5.5%)   | 2,863 (1.9%)    | 3.6 (3.1, 4.2)               | 0.193 (0.155, 0.230)             |
|                                         | Obstetrics/Gynaecology | 86,673 (8.5%)   | 54,696 (36.2%)  | 27.7 (27.2, 28.1)            | 0.704 (0.693, 0.715)             |
|                                         | Orthopaedic Surgery    | 379,088 (37.4%) | 12,862 (8.5%)   | 28.8 (28.3, 29.4)            | 0.730 (0.713, 0.748)             |
|                                         | Otolaryngology         | 16,410 (1.6%)   | 2,708 (1.8%)    | 0.2 (-0.4, 0.7)              | 0.014 (-0.027, 0.054)            |
|                                         | Plastic Surgery        | 41,543 (4.1%)   | 13,485 (8.9%)   | 4.8 (4.3, 5.4)               | 0.197 (0.177, 0.216)             |
|                                         | Thoracic Surgery       | 13,559 (1.3%)   | 1,476 (1.0%)    | 0.4 (-0.2, 0.9)              | 0.034 (-0.020, 0.087)            |
|                                         | Urology                | 89,339 (8.8%)   | 1,080 (0.7%)    | 8.1 (7.6, 8.6)               | 0.387 (0.327, 0.447)             |
|                                         | Vascular Surgery       | 4,066 (0.4%)    | 15 (0.0%)       | 0.4 (-0.1, 0.9)              | 0.086 (-0.421, 0.593)            |
| <b>Anesthesiologist characteristics</b> |                        |                 |                 |                              |                                  |
| Age                                     | Mean (SD), years       | 48.9 (10.1)     | 49.2 (10.4)     | 0.3 (0.3, 0.4)               | 0.032 (0.026, 0.037)             |
| Sex, n (%)                              | Female                 | 267,330 (26.3%) | 44,492 (29.5%)  | 3.1 (2.7, 3.6)               | 0.069 (0.059, 0.079)             |
|                                         | Male                   | 747,327 (73.7%) | 106,562 (70.5%) | 3.1 (2.8, 3.4)               | 0.069 (0.063, 0.076)             |
| Annual case volume (quartiles), n (%)   | 1 - Lowest             | 234,001 (23.1%) | 37,563 (24.9%)  | 1.8 (1.3, 2.3)               | 0.042 (0.031, 0.053)             |
|                                         | 2 -                    | 262,277 (25.8%) | 43,735 (29.0%)  | 3.1 (2.6, 3.6)               | 0.070 (0.060, 0.080)             |
|                                         | 3 -                    | 257,338 (25.4%) | 38,867 (25.7%)  | 0.4 (-0.1, 0.8)              | 0.008 (-0.002, 0.019)            |
|                                         | 4 - Highest            | 261,041 (25.7%) | 30,889 (20.4%)  | 5.3 (4.8, 5.8)               | 0.125 (0.114, 0.137)             |
| Years in practice                       | Mean (SD), years       | 14.6 (9.3)      | 14.9 (9.6)      | 0.4 (0.3, 0.4)               | 0.038 (0.033, 0.043)             |

| <b>Patient characteristics</b> |                                |                 |                 |                   |                       |
|--------------------------------|--------------------------------|-----------------|-----------------|-------------------|-----------------------|
| Age                            | Mean (SD), years               | 60.0 (17.2)     | 52.5 (16.3)     | 7.5 (7.4, 7.6)    | 0.446 (0.440, 0.451)  |
| Sex, n (%)                     | Female                         | 600,293 (59.2%) | 120,922 (80.1%) | 20.9 (20.6, 21.1) | 0.466 (0.460, 0.473)  |
|                                | Male                           | 414,364 (40.8%) | 30,132 (19.9%)  | 20.9 (20.4, 21.4) | 0.466 (0.455, 0.478)  |
| Comorbidity, n (%)             | ADG 0-5 – Lowest               | 263,940 (26.0%) | 40,900 (27.1%)  | 1.1 (0.6, 1.5)    | 0.024 (0.014, 0.035)  |
|                                | ADG 6-7                        | 240,746 (23.7%) | 37,511 (24.8%)  | 1.1 (0.6, 1.6)    | 0.026 (0.015, 0.037)  |
|                                | ADG 8-10                       | 304,439 (30.0%) | 45,875 (30.4%)  | 0.4 (-0.1, 0.8)   | 0.008 (-0.002, 0.018) |
|                                | AGD>=11- Highest               | 205,532 (20.3%) | 26,768 (17.7%)  | 2.5 (2.0, 3.0)    | 0.065 (0.052, 0.077)  |
| Rurality, n (%)                | Urban                          | 893,124 (88.0%) | 137,951 (91.3%) | 3.3 (3.1, 3.5)    | 0.109 (0.103, 0.114)  |
|                                | Rural                          | 121,533 (12.0%) | 13,103 (8.7%)   | 3.3 (2.8, 3.8)    | 0.109 (0.091, 0.127)  |
| Income quintile, n (%)         | 1 - Lowest                     | 194,036 (19.1%) | 28,275 (18.7%)  | 0.4 (-0.1, 0.9)   | 0.010 (-0.002, 0.023) |
|                                | 2 -                            | 205,328 (20.2%) | 30,195 (20.0%)  | 0.2 (-0.2, 0.7)   | 0.006 (-0.006, 0.018) |
|                                | 3 -                            | 204,020 (20.1%) | 30,152 (20.0%)  | 0.1 (-0.3, 0.6)   | 0.004 (-0.008, 0.016) |
|                                | 4 -                            | 206,707 (20.4%) | 31,030 (20.5%)  | 0.2 (-0.3, 0.7)   | 0.004 (-0.008, 0.016) |
|                                | 5 - Highest                    | 204,566 (20.2%) | 31,402 (20.8%)  | 0.6 (0.1, 1.1)    | 0.016 (0.004, 0.027)  |
| <b>Other characteristics</b>   |                                |                 |                 |                   |                       |
| Hospital status, n (%)         | Community hospital             | 678,409 (66.9%) | 94,463 (62.5%)  | 4.3 (4.0, 4.7)    | 0.091 (0.084, 0.097)  |
|                                | Academic hospital              | 336,248 (33.1%) | 56,591 (37.5%)  | 4.3 (3.9, 4.8)    | 0.091 (0.082, 0.099)  |
| Surgical procedure type, n (%) | Elective                       | 806,928 (79.5%) | 124,391 (82.3%) | 2.8 (2.6, 3.1)    | 0.072 (0.066, 0.078)  |
|                                | Urgent                         | 207,729 (20.5%) | 26,663 (17.7%)  | 2.8 (2.3, 3.3)    | 0.072 (0.059, 0.085)  |
| Case complexity, n (%)         | Low                            | 348,450 (34.3%) | 61,132 (40.5%)  | 6.1 (5.7, 6.5)    | 0.127 (0.118, 0.136)  |
|                                | High                           | 666,207 (65.7%) | 89,922 (59.5%)  | 6.1 (5.8, 6.5)    | 0.127 (0.120, 0.134)  |
| Duration of index surgery      | Missing on duration, n (%)     | 57,853 (5.7%)   | 7,665 (5.1%)    | 0.6 (0.1, 1.2)    | 0.028 (0.004, 0.052)  |
|                                | Non-missing on duration, n (%) | 956,804 (94.3%) | 143,389 (94.9%) | 0.6 (0.5, 0.8)    | 0.028 (0.022, 0.033)  |
|                                | Mean (SD), minutes             | 121.1 (103.0)   | 135.8 (111.0)   | 14.7 (14.1, 15.3) | 0.137 (0.132, 0.143)  |
| Year of index surgery, n (%)   | 2007                           | 89,521 (8.8%)   | 10,337 (6.8%)   | 2.0 (1.5, 2.5)    | 0.074 (0.053, 0.094)  |
|                                | 2008                           | 85,735 (8.4%)   | 11,238 (7.4%)   | 1.0 (0.5, 1.5)    | 0.037 (0.018, 0.057)  |
|                                | 2009                           | 85,322 (8.4%)   | 11,492 (7.6%)   | 0.8 (0.3, 1.3)    | 0.030 (0.010, 0.049)  |
|                                | 2010                           | 84,360 (8.3%)   | 11,471 (7.6%)   | 0.7 (0.2, 1.2)    | 0.027 (0.007, 0.046)  |
|                                | 2011                           | 85,119 (8.4%)   | 11,492 (7.6%)   | 0.8 (0.3, 1.3)    | 0.029 (0.009, 0.048)  |

|      |               |               |                 |                       |
|------|---------------|---------------|-----------------|-----------------------|
| 2012 | 82,446 (8.1%) | 11,723 (7.8%) | 0.4 (-0.2, 0.9) | 0.013 (-0.006, 0.033) |
| 2013 | 84,742 (8.4%) | 12,600 (8.3%) | 0.0 (-0.5, 0.5) | 0.000 (-0.018, 0.019) |
| 2014 | 82,275 (8.1%) | 13,307 (8.8%) | 0.7 (0.2, 1.2)  | 0.025 (0.007, 0.043)  |
| 2015 | 78,693 (7.8%) | 13,376 (8.9%) | 1.1 (0.6, 1.6)  | 0.040 (0.022, 0.058)  |
| 2016 | 73,790 (7.3%) | 12,109 (8.0%) | 0.7 (0.2, 1.3)  | 0.028 (0.009, 0.047)  |
| 2017 | 66,313 (6.5%) | 11,314 (7.5%) | 1.0 (0.4, 1.5)  | 0.037 (0.017, 0.057)  |
| 2018 | 61,085 (6.0%) | 10,633 (7.0%) | 1.0 (0.5, 1.5)  | 0.041 (0.021, 0.062)  |
| 2019 | 55,256 (5.4%) | 9,962 (6.6%)  | 1.1 (0.6, 1.7)  | 0.048 (0.027, 0.070)  |



**eTable 3. Multivariable adjusted total health care costs for patients undergoing common elective and emergent surgeries, stratified by patient-surgeon sex dyad.**

|                               | <b>Within 30 days (\$, 95% CI)</b> | <b>Within 90 days (\$, 95% CI)</b> | <b>Within 1 year (\$, 95% CI)</b> |
|-------------------------------|------------------------------------|------------------------------------|-----------------------------------|
| Male patient- male surgeon    | 15,151 (12,061 to 19,033)          | 19,269 (15,333 to 24,214)          | 28,869 (23,172 to 35,966)         |
| Male patient-female surgeon   | 12,986 (9,934 to 16,975)           | 16,450 (12,559 to 21,546)          | 25,050 (18,945 to 33,123)         |
| Female patient-male surgeon   | 11,920 (9,645 to 14,730)           | 15,267 (12,670 to 18,396)          | 21,751 (17,931 to 26,385)         |
| Female patient-female surgeon | 9,381 (7,983 to 11,025)            | 11,570 (10,210 to 13,111)          | 16,324 (14,311 to 18,619)         |

Note: results from GEE negative binomial modeling dealing with clustering based on procedure fee code, adjusted for surgeon age, surgeon annual case volume, surgeon years in practice, anesthesiologist age, anesthesiologist annual case volume, anesthesiologist years in practice, patient age, patient comorbidity, rurality, income quintile, and hospital status.

**eTable 4. Multivariable adjusted relative total health care costs for patients undergoing common elective and emergent surgeries, stratified by patient-surgeon sex dyad.**

|                                        | Among male patients                                    |         | Among female patients                                  |         |
|----------------------------------------|--------------------------------------------------------|---------|--------------------------------------------------------|---------|
|                                        | Male vs Female surgeon, adjusted relative risk 95% CI) | P-value | Male vs Female surgeon, adjusted relative risk 95% CI) | P-value |
| Total health care costs within 30 days | 1.08 (1.03-1.13)                                       | 0.0028  | 1.08 (1.04-1.13)                                       | 0.0001  |
| Total health care costs within 90 days | 1.08 (1.03-1.14)                                       | 0.0020  | 1.10 (1.05-1.14)                                       | <0.0001 |
| Total health care costs within 1 year  | 1.08 (1.02-1.14)                                       | 0.0068  | 1.09 (1.05-1.14)                                       | <0.0001 |

Note: using GEE modeling dealing with clustering based on procedure fee code (negative binomial regression with log link), adjusted for surgeon age (continuous), surgeon annual case volume (quartiles), surgeon specialty, surgeon years of practice (continuous), anesthesiologist age (continuous), anesthesiologist sex, anesthesiologist annual case volume (quartiles), anesthesiologist years of practice (continuous), patient age (continuous), patient comorbidity (categorical), rurality (rural vs. urban), income quintile (quintiles) , LHIN, hospital status (academic vs. community), and index year.

**eTable 5: Multivariable adjusted health care costs for patients undergoing common elective and emergent surgeries, stratified by patient-surgeon sex concordance.**

| Time Period and Outcome       | Male Patient Male Surgeon Adjusted Mean (95% CI) | Male Patient Female Surgeon Adjusted Mean (95% CI) | Female Patient Male Surgeon Adjusted Mean (95% CI) | Female Patient Female Surgeon Adjusted Mean Cost (\$, 95% CI) |
|-------------------------------|--------------------------------------------------|----------------------------------------------------|----------------------------------------------------|---------------------------------------------------------------|
| <b>Within 30 Days</b>         |                                                  |                                                    |                                                    |                                                               |
| Total health care costs       | 15151 (12061-19033)                              | 12986 (9934-16975)                                 | 11920 (9645-14730)                                 | 9381 (7983-11025)                                             |
| Inpatient costs               | 9719 (7392-12778)                                | 8152 (5600-11867)                                  | 6816 (6779-6852)                                   | 5397 (5331-5464)                                              |
| Post-discharge care costs     | 1129 (1115-1143)                                 | 711 (679-743)                                      | 838 (828-848)                                      | 382 (372-392)                                                 |
| Prescription medication costs | 118 (117-120)                                    | 96 (92-99)                                         | 63 (62-64)                                         | 40 (40-41)                                                    |
| Physician Costs               | 2965 (2387-3684)                                 | 2674 (2182-3276)                                   | 2489 (2115-2928)                                   | 2049 (1845-2276)                                              |
| <b>Within 90 Days</b>         |                                                  |                                                    |                                                    |                                                               |
| Total health care costs       | 19269 (15333-24214)                              | 16450 (12559-21546)                                | 15267 (12670-18396)                                | 11570 (10210-13111)                                           |
| Inpatient costs               | 11109 (8501-14517)                               | 9338 (6469-13479)                                  | 7865 (7820-7910)                                   | 5878 (5806-5951)                                              |
| Post-discharge care costs     | 1975 (1952-1999)                                 | 1276 (1221-1333)                                   | 1344 (1328-1359)                                   | 586 (571-602)                                                 |
| Prescription medication costs | 341 (337-346)                                    | 295 (286-305)                                      | 179 (178-181)                                      | 119 (117-121)                                                 |
| Physician Costs               | 3440 (2801-4225)                                 | 3103 (2550-3777)                                   | 2826 (2413-3310)                                   | 2341 (2124-2579)                                              |
| <b>Within 1 Year</b>          |                                                  |                                                    |                                                    |                                                               |
| Total health care costs       | 28869 (23172-35966)                              | 25050 (18945-33123)                                | 21751 (17931-26385)                                | 16324 (14311-18619)                                           |
| Inpatient costs               | 14006 (10947-17920)                              | 11975 (8442-16987)                                 | 8996 (8948-9044)                                   | 6701 (6620-6783)                                              |
| Post-discharge care costs     | 3450 (3391-3510)                                 | 2195 (2099-2295)                                   | 2128 (2104-2152)                                   | 950 (926-974)                                                 |
| Prescription medication costs | 1176 (1166-1186)                                 | 1106 (1073-1141)                                   | 690 (685-696)                                      | 479 (471-488)                                                 |
| Physician Costs               | 4765 (4755-4776)                                 | 4449 (4415-4484)                                   | 3971 (3462-4556)                                   | 3353 (3085-3644)                                              |

**eTable 6: Crude costs, stratified by surgeon sex.**

| Outcome                       | Label        | Outcome within 30 Days |                     | Outcome within 90 Days |                      | Outcome within 1-Year |                      |
|-------------------------------|--------------|------------------------|---------------------|------------------------|----------------------|-----------------------|----------------------|
|                               |              | Male Surgeon           | Female Surgeon      | Male Surgeon           | Female Surgeon       | Male Surgeon          | Female Surgeon       |
| Total health care costs       | Mean (SD)    | 13776.4<br>(12883.9)   | 9861.3<br>(10140.2) | 17500.5<br>(20923.2)   | 12215.9<br>(16167.6) | 26454.2<br>(36749.2)  | 18269.4<br>(28656.8) |
|                               | Median (IQR) | 11194 (5790-16334)     | 7126 (4836-10960)   | 12223 (6403-19132)     | 7600 (5321-12598)    | 15219 (7930-28819)    | 9296 (6715-17000)    |
| Inpatient costs               | Mean (SD)    | 8388.9 (9961.2)        | 5914.4<br>(8183.1)  | 9504.1<br>(15072.3)    | 6564.3<br>(11985.0)  | 11811.7<br>(22447.7)  | 7954.2<br>(17502.8)  |
|                               | Median (IQR) | 7747 (3271-10511)      | 5116 (0-7730)       | 7770 (3284-10681)      | 5144 (0-7783)        | 8179 (3476-11967)     | 5187 (0-8261)        |
| Post-discharge care costs     | Mean (SD)    | 1522.9 (3986.6)        | 544.3<br>(2263.8)   | 2676.8<br>(7205.0)     | 998.8 (4111.6)       | 4709.8<br>(14428.9)   | 1881.9<br>(8567.5)   |
|                               | Median (IQR) | 0 (0-1157)             | 0 (0-0)             | 0 (0-1478)             | 0 (0-0)              | 0 (0-1791)            | 0 (0-0)              |
| Prescription medication costs | Mean (SD)    | 103.6 (452.6)          | 55.8 (324.0)        | 303.2 (1094.5)         | 176.8 (881.8)        | 1168.1<br>(3887.5)    | 711.4<br>(3398.5)    |
|                               | Median (IQR) | 0 (0-86)               | 0 (0-9)             | 8 (0-309)              | 0 (0-72)             | 78 (0-1197)           | 0 (0-343)            |
| Physicians Costs              | Mean (SD)    | 2695.2 (2116.9)        | 2170.1<br>(1681.2)  | 3101.6<br>(2654.6)     | 2492.1<br>(2143.7)   | 4424.8<br>(3973.9)    | 3569.6<br>(3458.6)   |
|                               | Median (IQR) | 2181 (1407-3211)       | 1751 (1260-2472)    | 2413 (1590-3638)       | 1939 (1399-2817)     | 3306 (2129-5340)      | 2577 (1789-4111)     |

**eTable 7: Crude costs, stratified by patient-surgeon sex concordance.**

| Outcome                       | Label        | Male Patient -Male Surgeon | Male Patient-Female Surgeon | Female Patient-Male Surgeon | Female Patient-Female Surgeon |
|-------------------------------|--------------|----------------------------|-----------------------------|-----------------------------|-------------------------------|
|                               |              | N=414,364                  | N=30,132                    | N=600,293                   | N=120,922                     |
| <b>Within 30 days</b>         |              |                            |                             |                             |                               |
| Total health care costs       | Mean (SD)    | 14679.9 (14228.8)          | 13297.0 (15001.8)           | 13152.8 (11826.8)           | 9005.2 (8288.1)               |
|                               | Median (IQR) | 12056 (5826-16820)         | 8652 (4518-16175)           | 10399 (5750-15980)          | 7053 (4898-9755)              |
| Inpatient costs               | Mean (SD)    | 9282.7 (11342.1)           | 8443.4 (12323.3)            | 7772.0 (8831.1)             | 5284.2 (6619.5)               |
|                               | Median (IQR) | 8181 (3470-10894)          | 5056 (1991-10670)           | 7240 (2057-10410)           | 5116 (0-6872)                 |
| Post-discharge care costs     | Mean (SD)    | 1341.6 (3642.7)            | 800.2 (2757.7)              | 1648.0 (4203.1)             | 480.6 (2118.1)                |
|                               | Median (IQR) | 0 (0-1155)                 | 0 (0-696)                   | 0 (0-1163)                  | 0 (0-0)                       |
| Prescription medication costs | Mean (SD)    | 124.1 (520.3)              | 93.5 (476.9)                | 89.4 (398.6)                | 46.4 (272.1)                  |
|                               | Median (IQR) | 3 (0-107)                  | 0 (0-45)                    | 0 (0-71)                    | 0 (0-5)                       |
| Physician Costs               | Mean (SD)    | 2906.9 (2407.7)            | 2813.8 (2427.3)             | 2549.1 (1876.4)             | 2009.7 (1390.6)               |
|                               | Median (IQR) | 2319 (1405-3467)           | 2148 (1313-3497)            | 2100 (1408-3044)            | 1698 (1251-2292)              |
| <b>Within 90 days</b>         |              |                            |                             |                             |                               |
| Total health care costs       | Mean (SD)    | 18899.3 (23308.9)          | 17422.5 (24470.4)           | 16534.9 (19043.6)           | 10918.5 (12995.3)             |
|                               | Median (IQR) | 13152 (6661-20231)         | 10005 (5115-19578)          | 11373 (6244-18411)          | 7487 (5371-11131)             |

|                               |              |                    |                    |                    |                   |
|-------------------------------|--------------|--------------------|--------------------|--------------------|-------------------|
| Inpatient costs               | Mean (SD)    | 10686.0 (17442.5)  | 9945.6 (18971.1)   | 8688.2 (13128.1)   | 5721.7 (9284.1)   |
|                               | Median (IQR) | 8378 (3526-11299)  | 5235 (2040-10973)  | 7274 (2214-10503)  | 5144 (0-6957)     |
| Post-discharge care costs     | Mean (SD)    | 2420.1 (6885.0)    | 1601.5 (5342.2)    | 2854.0 (7412.7)    | 848.6 (3727.3)    |
|                               | Median (IQR) | 0 (0-1457)         | 0 (0-1001)         | 0 (0-1499)         | 0 (0-0)           |
| Prescription medication costs | Mean (SD)    | 364.9 (1260.9)     | 304.1 (1318.3)     | 260.7 (960.8)      | 145.0 (730.3)     |
|                               | Median (IQR) | 49 (0-370)         | 0 (0-235)          | 0 (0-264)          | 0 (0-45)          |
| Physician Costs               | Mean (SD)    | 3374.4 (3014.7)    | 3262.7 (3123.4)    | 2913.3 (2356.0)    | 2300.1 (1767.8)   |
|                               | Median (IQR) | 2581 (1639-3969)   | 2388 (1464-3972)   | 2313 (1565-3426)   | 1878 (1390-2605)  |
| <b>Within 1 year</b>          |              |                    |                    |                    |                   |
| Total health care costs       | Mean (SD)    | 29239.1 (40977.0)  | 27262.0 (42071.1)  | 24532.0 (33386.1)  | 16028.5 (23656.5) |
|                               | Median (IQR) | 16597 (9466-31559) | 13325 (6398-29683) | 14098 (7461-26939) | 8975 (6776-14954) |
| Inpatient costs               | Mean (SD)    | 13590.9 (26485.7)  | 12781.1 (27560.9)  | 10583.6 (19073.9)  | 6751.4 (13644.0)  |
|                               | Median (IQR) | 8857 (3619-13625)  | 6380 (2335-12732)  | 7686 (2836-11525)  | 5179 (0-7453)     |
| Post-discharge care costs     | Mean (SD)    | 4342.5 (14080.3)   | 3095.3 (11600.5)   | 4963.4 (14659.4)   | 1579.6 (7596.2)   |
|                               | Median (IQR) | 0 (0-1787)         | 0 (0-1310)         | 0 (0-1791)         | 0 (0-0)           |
| Prescription medication costs | Mean (SD)    | 1396.9 (4441.0)    | 1204.3 (4535.8)    | 1010.1 (3445.2)    | 588.5 (3037.4)    |

|                 |              |                  |                  |                  |                  |
|-----------------|--------------|------------------|------------------|------------------|------------------|
|                 | Median (IQR) | 232 (0-1450)     | 9 (0-998)        | 31 (0-1017)      | 0 (0-205)        |
| Physician Costs | Mean (SD)    | 4853.4 (4439.6)  | 4657.5 (4757.1)  | 4129.0 (3587.9)  | 3298.5 (2989.2)  |
|                 | Median (IQR) | 3577 (2270-5887) | 3205 (1887-5733) | 3135 (2052-4990) | 2486 (1773-3796) |

**eTable 8: Sensitivity analysis of multivariable adjusted models assessing the association between surgeon sex and total health care costs, further including operative duration as a covariate.**

|                         | Outcome within 30 Days                                   |         | Outcome within 90 Days                                   |         | Outcome within 1 Year                                    |         |
|-------------------------|----------------------------------------------------------|---------|----------------------------------------------------------|---------|----------------------------------------------------------|---------|
|                         | Male vs. Female Surgeon, adjusted relative risk (95% CI) | P value | Male vs. Female Surgeon, adjusted relative risk (95% CI) | P value | Male vs. Female Surgeon, adjusted relative risk (95% CI) | P value |
| Total health care costs | 1.11 (1.08-1.15)                                         | <0.0001 | 1.12 (1.08-1.16)                                         | <0.0001 | 1.12 (1.08-1.15)                                         | <0.0001 |



**eTable 9: Sensitivity analysis of multivariable adjusted models assessing the association between patient-surgeon sex concordance and total health care costs, further including operative duration as a covariate.**

|                                        | Among male patients                                     |         | Among female patients                                   |         |
|----------------------------------------|---------------------------------------------------------|---------|---------------------------------------------------------|---------|
|                                        | Male vs Female surgeon, adjusted relative risk (95% CI) | P-value | Male vs Female surgeon, adjusted relative risk (95% CI) | P-value |
| Total health care costs within 30 days | 1.09 (1.05-1.12)                                        | <0.0001 | 1.11 (1.08-1.15)                                        | <0.0001 |
| Total health care costs within 90 days | 1.09 (1.05-1.13)                                        | <0.0001 | 1.13 (1.09-1.17)                                        | <0.0001 |
| Total health care costs within 1 year  | 1.09 (1.04-1.15)                                        | <0.0001 | 1.12 (1.08-1.16)                                        | <0.0001 |
