# Supplementary material
Source: PubMed Central journal article supplement (PMC10687714)
Supplement: jamasurg-e236031-s002.pdf [file jamasurg-e236031-s002.pdf]

## Data Sharing Statement

Wallis. Surgeon Sex and Health Care Costs for Patients Undergoing Common Surgical Procedures. *JAMA Surg.* Published November 29, 2023. doi:10.1001/jamasurg.2023.6031

### Data

**Data available:** No
